# Supplementary material for: Recurrent herpes zoster ophthalmicus in a young, healthy individual taking high doses of l-Arginine
Source: PubMed Central journal article supplement — Am J Ophthalmol Case Rep. 2019 Aug 20;16:100547. doi: 10.1016/j.ajoc.2019.100547 (PMC6722283; doi:10.1016/j.ajoc.2019.100547), 2019-08-20
Supplement: mmc2.pdf [file mmc2.pdf]

**Question 1:**

Which of the following is false regarding L-arginine

- It is associated with replication of the herpes virus family
- Meat such as pork and beef have a high concentration per ounce
- It is an essential amino acid

*Explanation:*

L-arginine is a conditional or semi-essential amino acid which is produced in the body. It becomes essential once the demands are greater than production (e.g. developing infants/children or adults experiencing catabolic stress such a trauma or illness).

- Nitric oxide via nitric oxide synthase is produced from L-arginine
